# Supplementary material for: Dialkylated dibenzo[a,h]anthracenes for solution-processable organic thin-film transistors
Source: Royal Society of Chemistry journal article supplement (doi:10.1039/d4ra07439d), 2024-01-01
Supplement: d4ra07439d1.pdf [file d4ra07439d1.pdf]

## Supporting Information

### Dialkylated Dibenzo[*a,h*]anthracenes for Solution-processable Organic Thin-Film Transistors

Tengzhou Yang<sup>a</sup>, Liang Zhang, Yucong Bao, and Haoming Wei<sup>\*a</sup>

<sup>a</sup>. School of Physics and Physical Engineering, Qufu Normal University, Qufu 273165, Shandong, China.

**Table S1.** List of solubility of C12-DBA-C12 and Cy5-DBA-Cy5

| Solvent       | Solubility (mg/ml, 60 °C) |             |
|---------------|---------------------------|-------------|
|               | C12-DBA-C12               | Cy5-DBA-Cy5 |
| Anisole       | 2.56                      | < 0.9       |
| Chlorobenzene | 15.38                     | 4.44        |

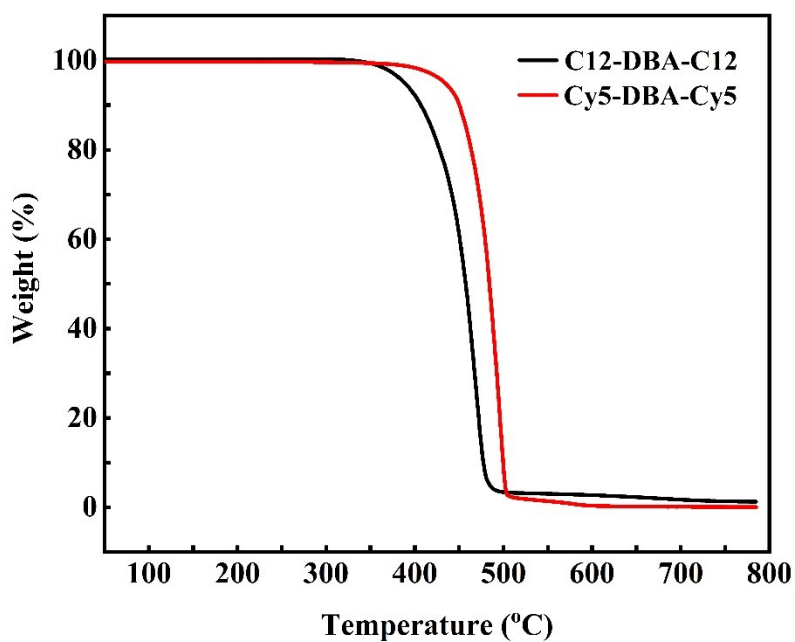

**Figure S1.** TGA thermograms of C12-DBA-C12 and Cy5-DBA-Cy5 at a heating rate of 10 °C/min under N<sub>2</sub> atmosphere

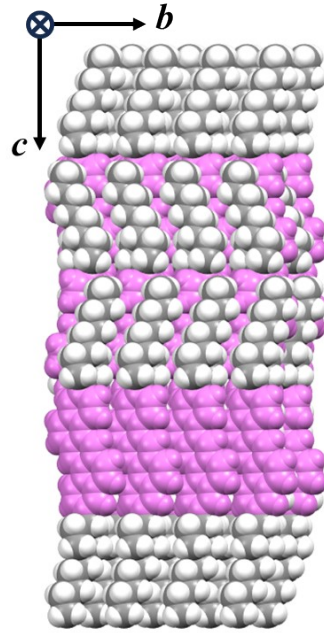

**Figure S2.** The molecular packing in the  $b$ - $c$  plane of Cy5-DBA-Cy5 crystal (the DBA cores were marked in violet for clarity)

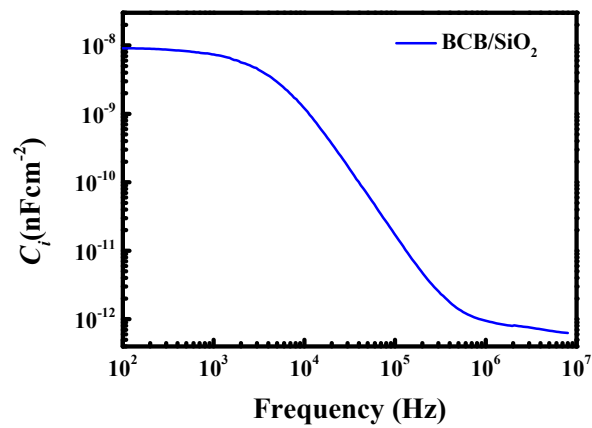

**Figure S3.** Frequency dependence of capacitance ( $C_i$ ) for BCB/SiO<sub>2</sub> dielectrics measured from the sandwich structure (Au/insulator/heavily p-doped Si), showing  $C_i$  9.1 nF cm<sup>-2</sup>, at 100 Hz.

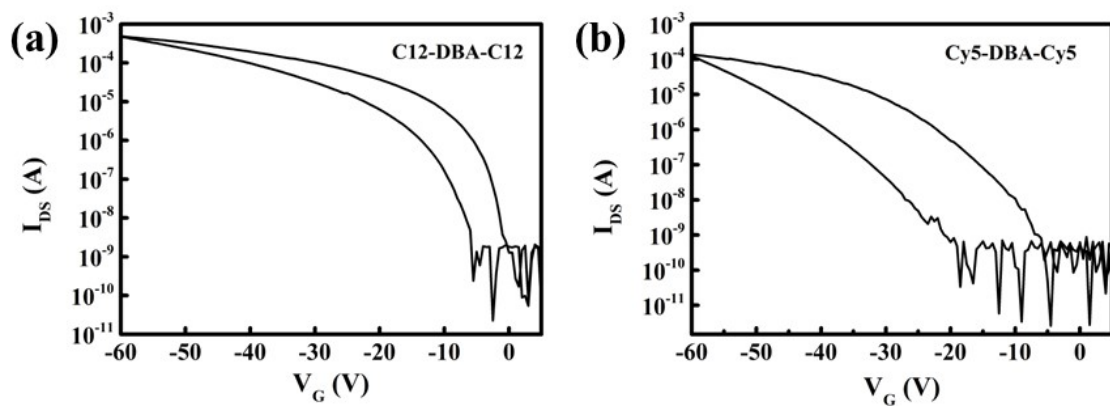

**Figure S4.** Transfer curves of C12-DBA-C12 and Cy5-DBA-Cy5 OTFTs during forward and the forward and reverse scanning

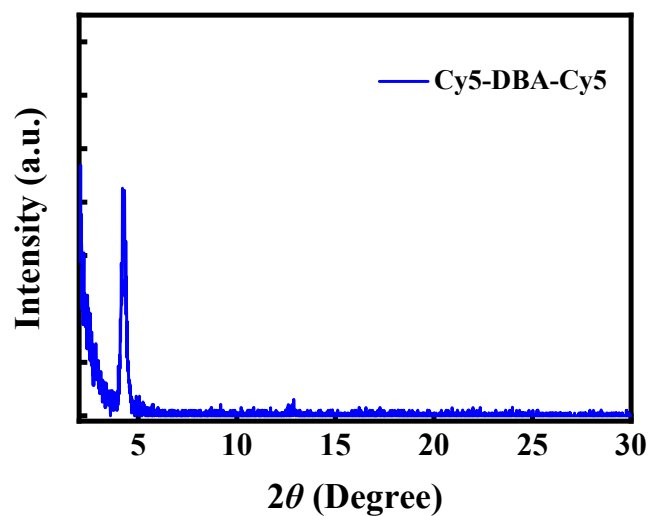

**Figure S5.** XRD patterns of the blade-coated Cy5-DBA-Cy5 film on the BCB/SiO<sub>2</sub> dielectric.

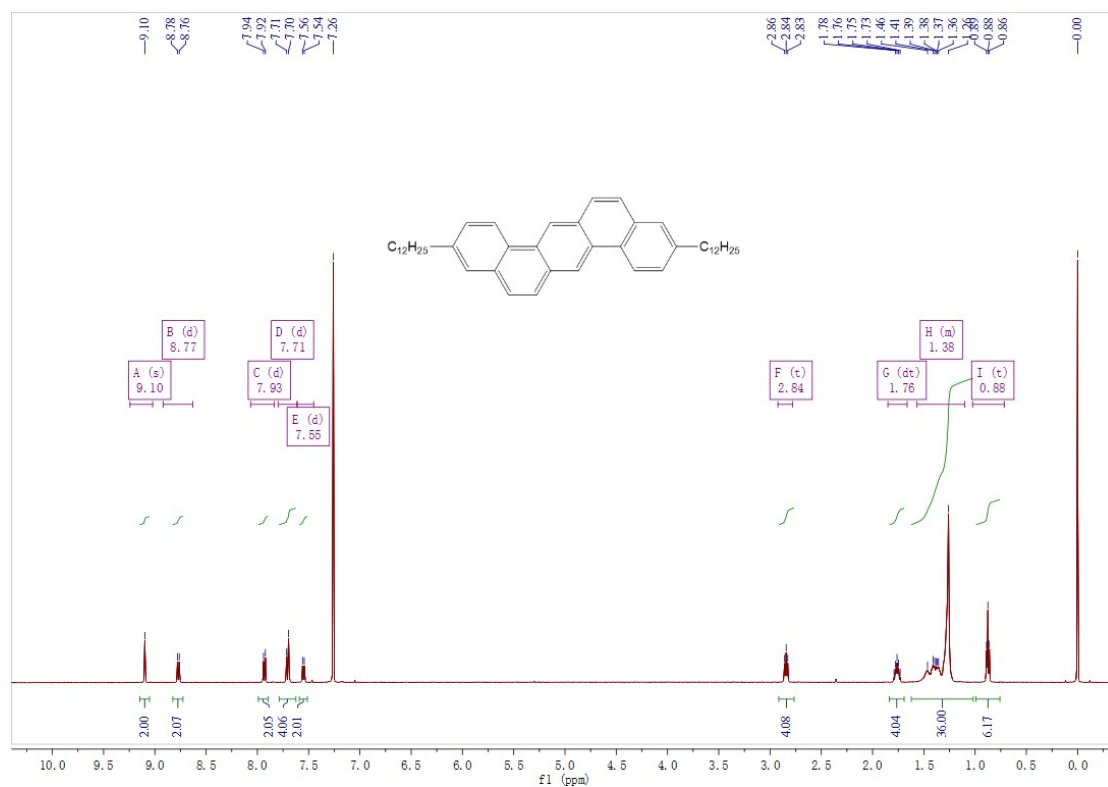

**Figure S6.** <sup>1</sup>H NMR spectrum of C12-DBA-Cy12

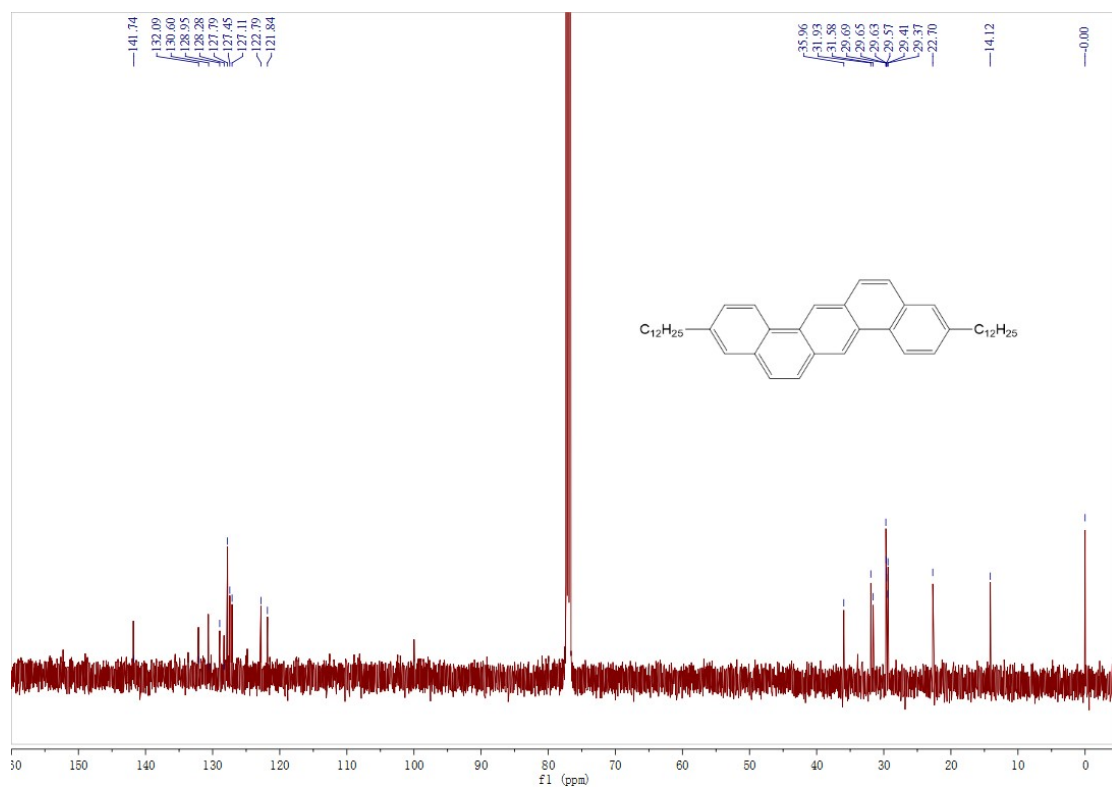

Figure S7. <sup>13</sup>C NMR spectrum of C12-DBA-Cy12

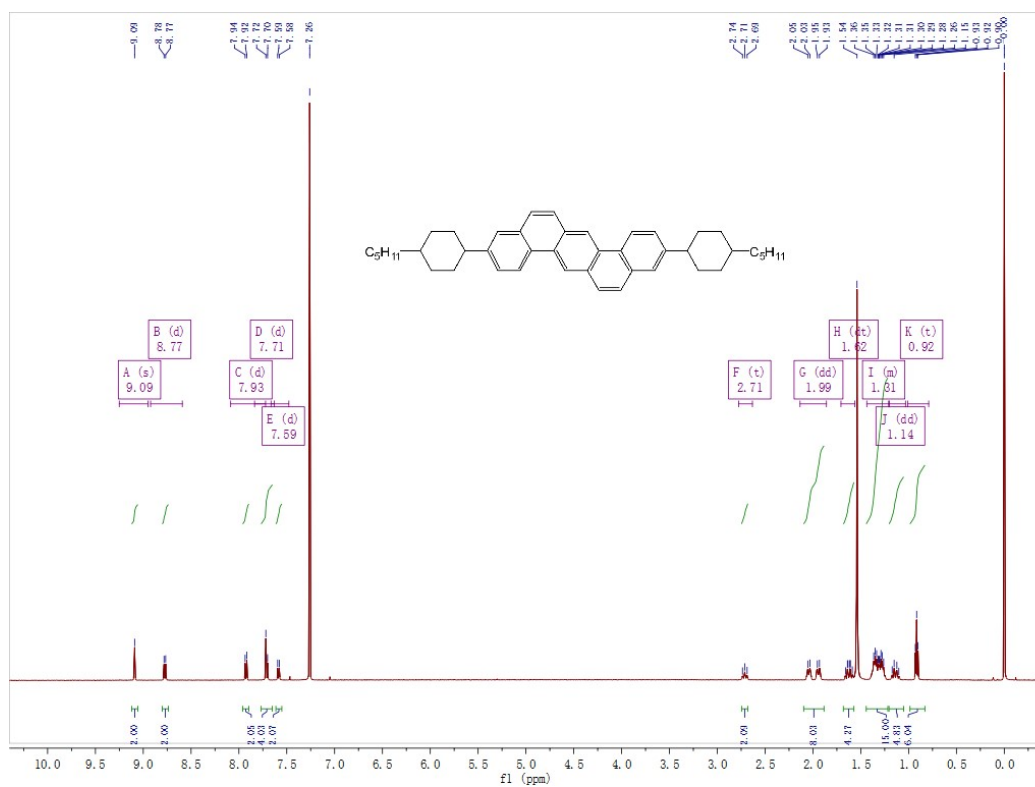

Figure S8. <sup>1</sup>H NMR spectrum of Cy5-DBA-Cy5

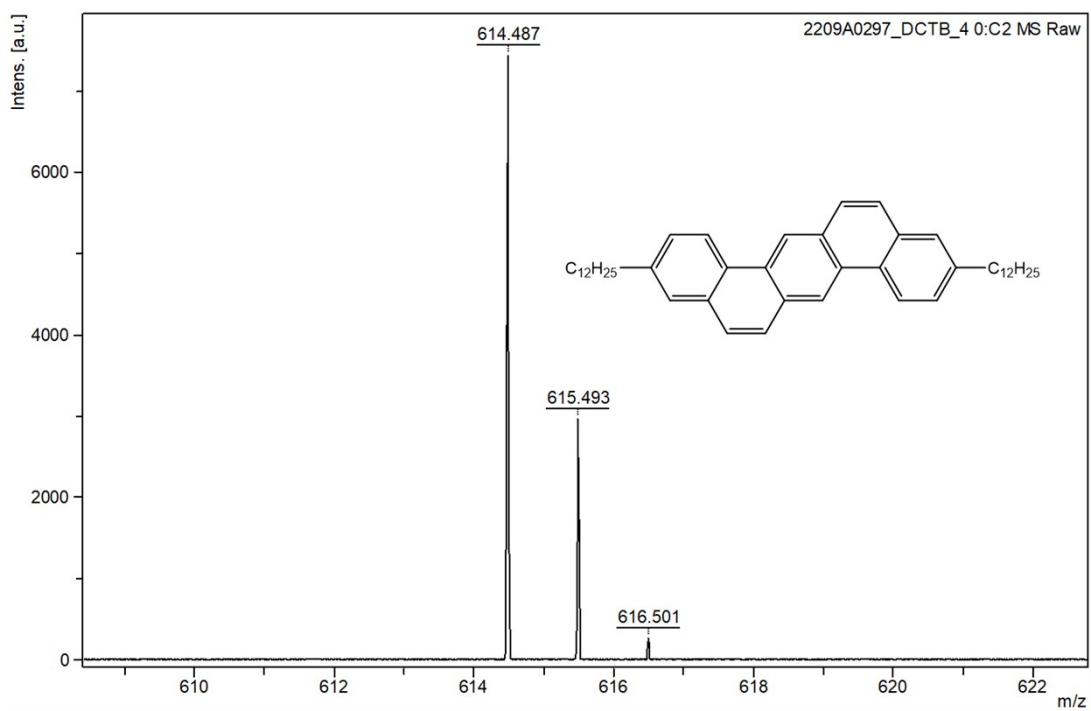

Figure S9. HRMS spectrometry of C12-DBA-C12

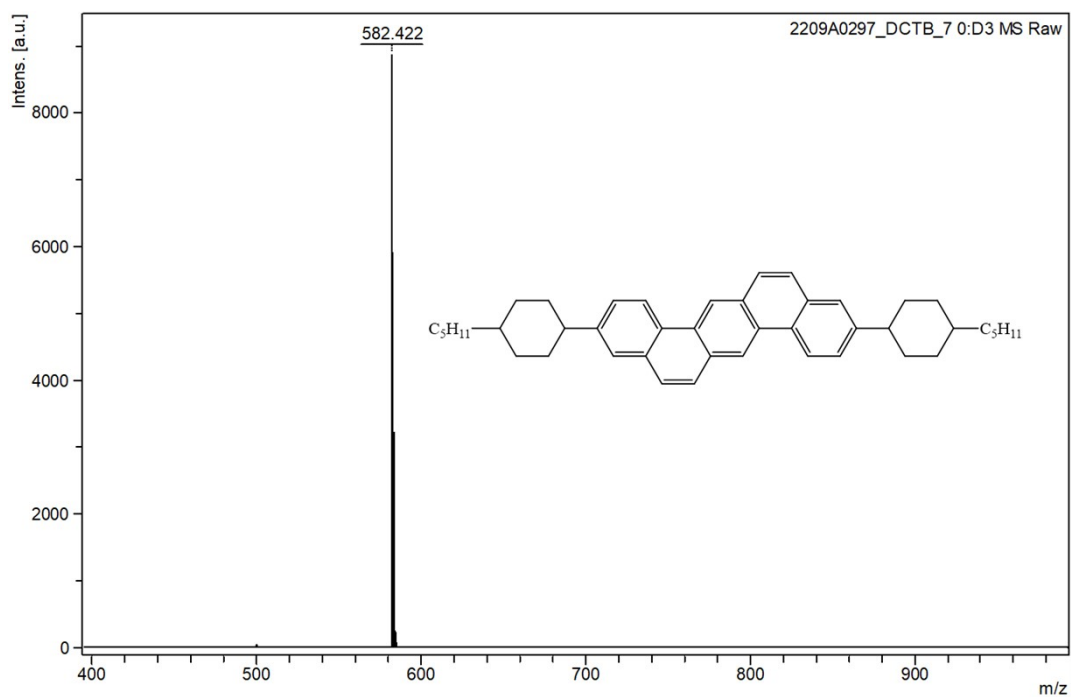

Figure S10. HRMS spectrometry of Cy5-DBA-Cy5

**Table S2.** Crystal structures of C12-DBA-C12 and Cy5-DBA-Cy5

| Empirical                               | C12-DBA-C12                                                       | Cy5-DBA-Cy5                                                       |
|-----------------------------------------|-------------------------------------------------------------------|-------------------------------------------------------------------|
| Formula weight                          | 614.95                                                            | 582.87                                                            |
| Temperature/K                           | 295                                                               | 289                                                               |
| Crystal system                          | triclinic                                                         | monoclinic                                                        |
| Space group                             | P-1                                                               | C2/c                                                              |
| a/Å                                     | 6.9582(3)                                                         | 25.7538(5)                                                        |
| b/Å                                     | 7.7761(4)                                                         | 5.77880(10)                                                       |
| c/Å                                     | 34.9263(15)                                                       | 25.3638(4)                                                        |
| $\alpha$ /°                             | 88.781(4)                                                         | 90                                                                |
| $\beta$ /°                              | 89.088(3)                                                         | 112.982(2)                                                        |
| $\gamma$ /°                             | 89.979(4)                                                         | 90                                                                |
| Volume/Å <sup>3</sup>                   | 1889.11(15)                                                       | 3475.18(12)                                                       |
| Z                                       | 2                                                                 | 4                                                                 |
| $\rho_{\text{calc}}/\text{cm}^3$        | 1.081                                                             | 1.114                                                             |
| $\mu/\text{mm}^{-1}$                    | 0.442                                                             | 0.459                                                             |
| F(000)                                  | 676.0                                                             | 1272.0                                                            |
| Crystal size/mm <sup>3</sup>            | 0.03 × 0.02 × 0.01                                                | 0.12 × 0.03 × 0.02                                                |
| Radiation                               | Cu K $\alpha$ ( $\lambda$ = 1.54184)                              | Cu K $\alpha$ ( $\lambda$ = 1.54184)                              |
| 2 $\Theta$ range for data collection/°  | 5.062 to 144.232                                                  | 7.572 to 155.4                                                    |
| Index ranges                            | -8 ≤ h ≤ 8, -7 ≤ k ≤ 9,<br>-42 ≤ l ≤ 43                           | -31 ≤ h ≤ 32, -7 ≤ k ≤ 2,<br>-30 ≤ l ≤ 31                         |
| Reflections collected                   | 23926                                                             | 11199                                                             |
| Independent reflections                 | 7098 [ $R_{\text{int}}$ = 0.0993, $R_{\text{sigma}}$ =<br>0.0605] | 3527 [ $R_{\text{int}}$ = 0.0175, $R_{\text{sigma}}$<br>= 0.0236] |
| Data/restraints/parameters              | 7098/0/417                                                        | 3527/0/200                                                        |
| Goodness-of-fit on F <sup>2</sup>       | 1.088                                                             | 1.132                                                             |
| Final R indexes [ $I \geq 2\sigma(I)$ ] | $R_1$ = 0.1174, $wR_2$ = 0.3056                                   | $R_1$ = 0.0782, $wR_2$ =<br>0.2576                                |

---

|                                             |                                  |                                     |
|---------------------------------------------|----------------------------------|-------------------------------------|
| Final R indexes [all data]                  | $R_1 = 0.1679$ , $wR_2 = 0.3415$ | $R_1 = 0.0863$ , $wR_2 =$<br>0.2708 |
| Largest diff. peak/hole / e Å <sup>-3</sup> | 0.35/-0.29                       | 0.60/-0.27                          |

---
